# Supplementary material for: Applying nanopore sequencing technology in Paracoccidioides sp.: a high-quality DNA isolation method for next-generation genomic studies
Source: PubMed Central journal article supplement (PMC11493184; doi:10.1099/mgen.0.001302), 2024-10-21
Supplement: mgen-10-01302-s001.pdf [file mgen-10-01302-s001.pdf]

## Supplementary Material

- DNA extraction from yeast culture of *Paracoccidioides spp*

**WARNING: Always work in a class II biosafety cabinet.**

NOTE: All centrifugation steps are carried out at room temperature.

1. In a class II biosafety cabinet, resuspend 0.3 g of a pure yeast culture in a 2 ml screw cap tube with 500  $\mu$ l of TES solution (0.1 M Tris-HCl pH 8; 10 mM EDTA; 2% SDS) and 0.3 g of glass beads (850-425  $\mu$ m).
2. Vortex for 15 minutes.
3. Add 5 $\mu$ l of Proteinase K (10 mg/ml). Incubate at 55 °C for 1 hour.
4. Centrifuge at 12000 rpm for 1 minute and transfer the supernatant into a new tube cautiously to avoid carrying away cellular debris from the pellet.
5. Add 500  $\mu$ l of 2% CTAB solution (1.4 M NaCl; 20 mM EDTA; 100 mM Tris-HCl pH 8; 0.2 % 2-Mercaptoethanol; 5 % CTAB). Incubate at 65 °C for 1 hour.
6. Add 500  $\mu$ l of chloroform:isoamyl alcohol (24:1) and mix by inverting the tube until the phases are completely mixed.
7. Centrifuge at 12000 rpm for 5 minutes. Recover the supernatant (aqueous phase) into a new tube. Avoid pipetting and transferring the interface and the lower organic phase.
8. Add 5 $\mu$ l of Rnase A (10mg/ml). Incubate at 37 °C for 30 minutes.
9. Repeat steps 6 and 7 once.
10. To precipitate the DNA, add 2.5 volumes of -20°C stored pure ethanol and mix gently. Incubate at -20 °C overnight or at least for 30 minutes.
11. Centrifuge at 12000 rpm for 15 minutes. Carefully discard the supernatant without disturbing the pellet.
12. Add 500 $\mu$ l of cold 70% ethanol.
13. Centrifuge at 12000 rpm for 5 minutes. Discard the supernatant. Carefully discard the supernatant without disturbing the pellet.
14. Repeat steps 12 and 13 once.
15. Dry 30 minutes at 50°C.
16. Resuspend the pellet in 60 $\mu$ l of molecular biology grade water or in TE buffer.

- Scripts

#### Basecalling, reads filtering and assembly

```
$ dorado basecaller --emit-fastq dna_r9.4.1_e8_sup@v3.3 paracocci.pod5 > paracocci.fastq
```

```
$ filtlong --min_mean_q 10 --min_length 1000 paracocci.fastq > $ paracocci.500_10q.fastq
```

```
$ flye --nano-hq paracocci.500_10q.fastq --threads 55 -o assembly
```

```
$ medaka_consensus -d assembly/assembly.fasta -i paracocci.500_q10.fastq.gz -t 40 -m r941_min_sup_g507
```

```
# All contigs with length below 1000bp were removed
```

#### Chromosome and mitochondrion classification

```
$ blastn -query paracocci_IMR-M-Pb_369.fasta -subject Paracocci_br_Pb01_V2_genomic.fna -outfmt 6 -out chromosome.blastn
```

```
$ blastn -query paracocci_IMR-M-Pb_369.fasta -subject Paracoccidiodes_brasiliensis_mitochondrion.fna -outfmt 6 -out mitochondrion.blastn
```

```
# All IDs of contigs matching with mitochondria are extracted from the blasts results and stored in the file "mitochondrion_contigs.list"
```

#### Mitochondrion re-assembly

```
$ minimap2 -x map-ont -t 55 -a -o paracocci_IMR-M-Pb_369.sam paracocci_IMR-M-Pb_369.fasta paracocci.fastq
```

```
$ grep -f mitochondrion_contigs.list paracocci_IMR-M-Pb_369.sam | cut -f 1 > mitochondrion_reads.list
```

```
$ grep -f mitochondrion_reads.list -A 3 --no-group-separator paracocci.500_10q.fastq > mitochondrion_reads.fastq
```

```
$ filtlong -t 17649600 mitochondrion_reads.fastq > mitochondrion_reads.150X.fastq
```

```
$ flye --nano-hq mitochondrion_reads.150X.fastq --threads 40 -o mitochondrion_assembly
```

```
$ medaka_consensus -d mitochondrion_assembly/assembly.fasta -i mitochondrion_reads.150X.fastq -t 40 -m r941_min_sup_g507
```

#### Phylogeny

```
$ blastn -query paracocci_IMR-M-Pb_369.fasta -subject GP43_Pb01.fasta -outfmt 6 -out GP43.blastn
```

```
# The gene is extracted from the assembly using BLAST's match coordinates and one file with all the GP43 sequences available is constructed
```

```
$ cd-hit -c 1 -i GP43.fasta -o GP43.reduced
```

```
$ mafft --maxiterate 1000 --localpair --thread 55 GP43_reduced.fasta > GP43.aligned.fasta
```

```
$ raxmlHPC-PTHREADS-SSE3 -m GTRGAMMAI -n GP43 -p 123654 -s GP43.aligned.fasta -T 50 -# 20
```

```
$ raxmlHPC-PTHREADS-SSE3 -m GTRGAMMAI -n GP43_bootstraps -p 123654 -s GP43.aligned.fasta -T 50 -N 1000 -x 123654
```

```
$ raxmlHPC-PTHREADS-SSE3 -m GTRGAMMAI -p 123654 -f b -t RAXML_bestTree.GP43 -z RAXML_bootstrap.GP43_bootstraps -n GP43_final
```

- Phylogenetic tree sequences (exon 2 of GP43)

| Strain  | Species             | Accession  | Reference             |
|---------|---------------------|------------|-----------------------|
| B13     | P. brasiliensis PS2 | DQ003736.1 | Matute et al., 2006   |
| B15     | P. brasiliensis PS2 | DQ003738.1 | Matute et al., 2006   |
| B23     | P. brasiliensis PS2 | DQ003746.1 | Matute et al., 2006   |
| B26     | P. brasiliensis PS2 | DQ003749.1 | Matute et al., 2006   |
| B7      | P. brasiliensis PS2 | DQ003730.1 | Matute et al., 2006   |
| V2      | P. brasiliensis PS2 | DQ003772.1 | Matute et al., 2006   |
| C3      | P. brasiliensis PS3 | DQ003752.1 | Matute et al., 2006   |
| C4      | P. brasiliensis PS3 | DQ003753.1 | Matute et al., 2006   |
| C6      | P. brasiliensis PS3 | DQ003755.1 | Matute et al., 2006   |
| C16     | P. brasiliensis PS3 | DQ003765.1 | Matute et al., 2006   |
| C18     | P. brasiliensis PS3 | DQ003767.1 | Matute et al., 2006   |
| 8652    | P. brasiliensis S1  | KY963815.1 | Hrycyk et al. (2018)  |
| A1      | P. brasiliensis S1  | DQ003780.1 | Matute et al., 2006   |
| A4      | P. brasiliensis S1  | DQ003781.1 | Matute et al., 2006   |
| A6      | P. brasiliensis S1  | DQ003783.1 | Matute et al., 2006   |
| A7      | P. brasiliensis S1  | DQ003784.1 | Matute et al., 2006   |
| B8      | P. brasiliensis S1  | DQ003731.1 | Matute et al., 2006   |
| B9      | P. brasiliensis S1  | DQ003732.1 | Matute et al., 2006   |
| B21     | P. brasiliensis S1  | DQ003744.1 | Matute et al., 2006   |
| P1      | P. brasiliensis S1  | DQ003786.1 | Matute et al., 2006   |
| P2      | P. brasiliensis S1  | DQ003787.1 | Matute et al., 2006   |
| V1      | P. brasiliensis S1  | DQ003771.1 | Matute et al., 2006   |
| V3      | P. brasiliensis S1  | DQ003773.1 | Matute et al., 2006   |
| V4      | P. brasiliensis S1  | DQ003774.1 | Matute et al., 2006   |
| V5      | P. brasiliensis S1  | DQ003775.1 | Matute et al., 2006   |
| V6      | P. brasiliensis S1  | DQ003776.1 | Matute et al., 2006   |
| HCRP191 | P. lutzii           | MK909806.1 | Cocio et al., 2020    |
| Pb01    | P. lutzii           | EU870196.1 | Teixeira et al., 2009 |
